# Supplementary material for: Molecular mechanisms by which HERV-K Gag interferes with HIV-1 Gag assembly and particle infectivity
Source: PubMed Central journal article supplement (PMC5406883; doi:10.1186/s12977-017-0351-8), 2017-04-26

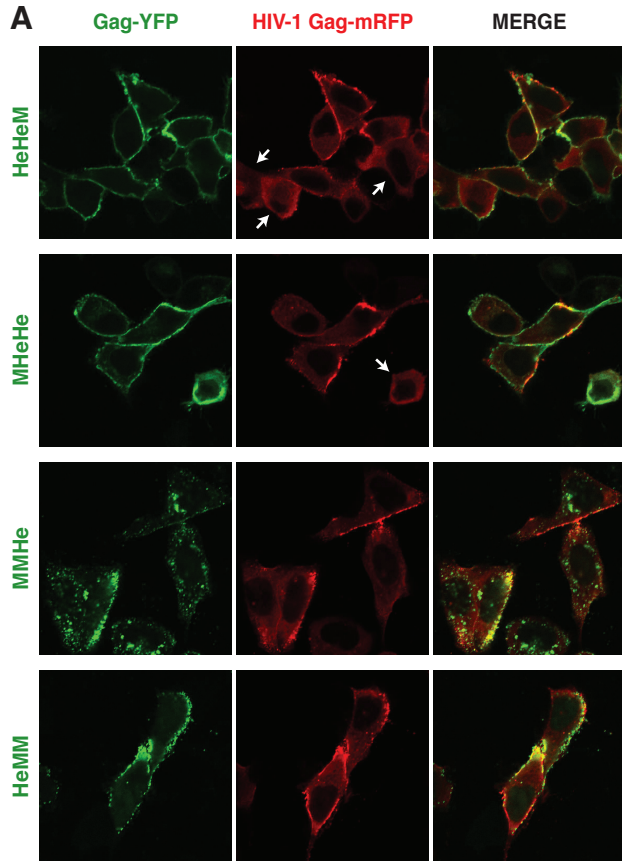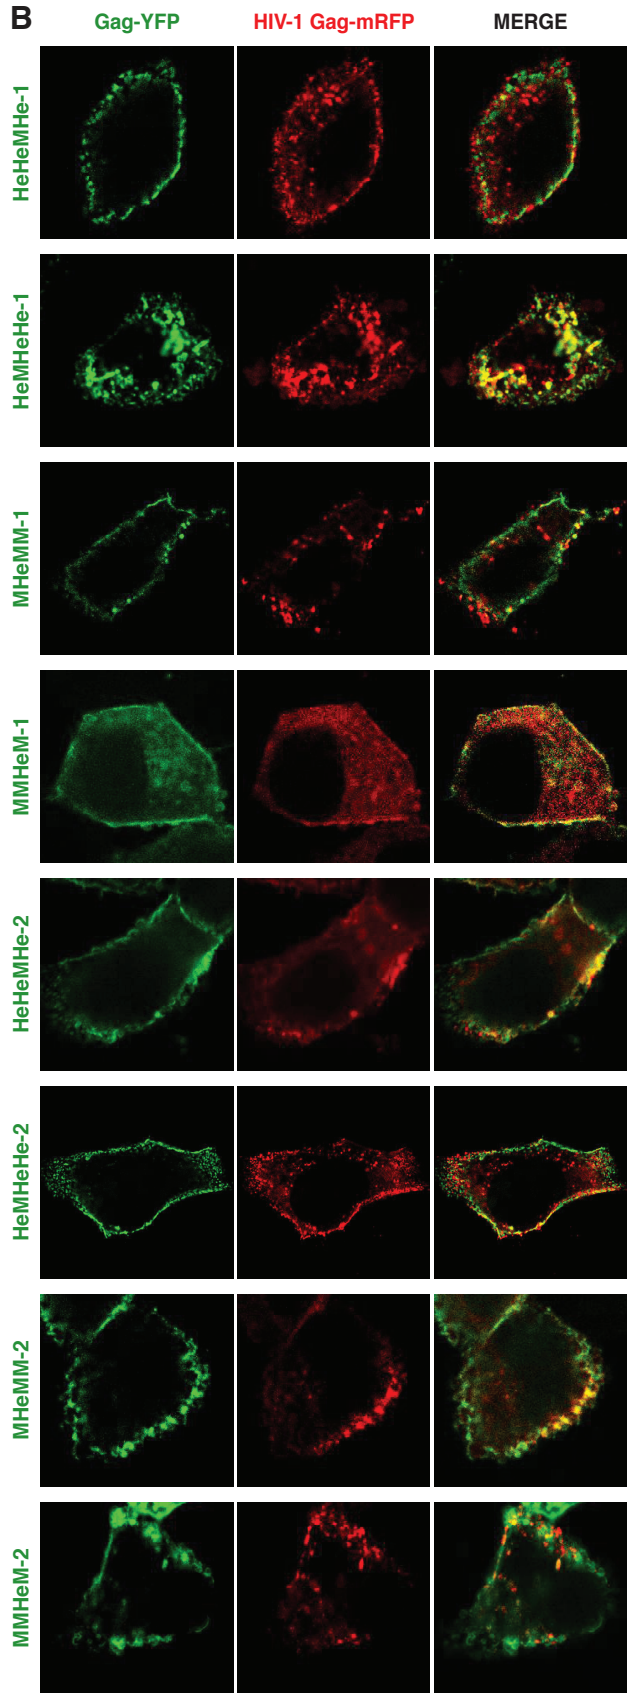

Supplement: 12977_2017_351_MOESM2_ESM.pdf [file 12977_2017_351_MOESM2_ESM.pdf]
